# Supplementary material for: Feasibility and Effect of a Wearable Motion Sensor Device in Facilitating In-Home Rehabilitation Program in Patients after Total Knee Arthroplasty: A Preliminary Study
Source: MDPI journal article supplement (doi:10.3390/app12052433), 2022-02-25
Supplement: s1 [file s1]

Archive with 1 entries (1 files):
- applsci-1565859-supplementary.pdf
